# Supplementary material
Source: Springer Nature journal article supplement (https://www.springermedizin.de/resource/supplementary/12885_2010_2523_MOESM7_ESM.pdf/9461974)

**A**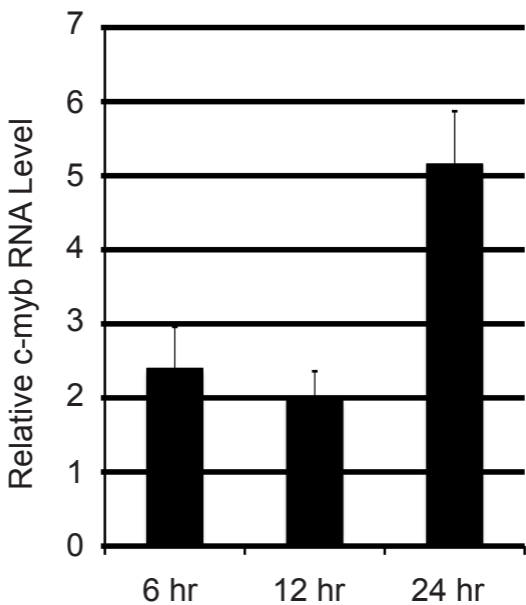**B**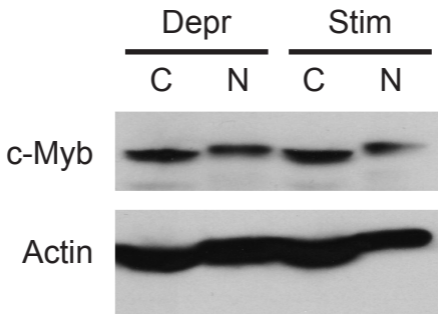

Supplement: MOESM7 [file 9461974]
